# Supplementary material for: Betulinic Acid Increases the Lifespan of Drosophila melanogaster via Sir2 and FoxO Activation
Source: MDPI journal article supplement (doi:10.3390/nu16030441), 2024-02-01
Supplement: s1 [file s1]

Figure S1

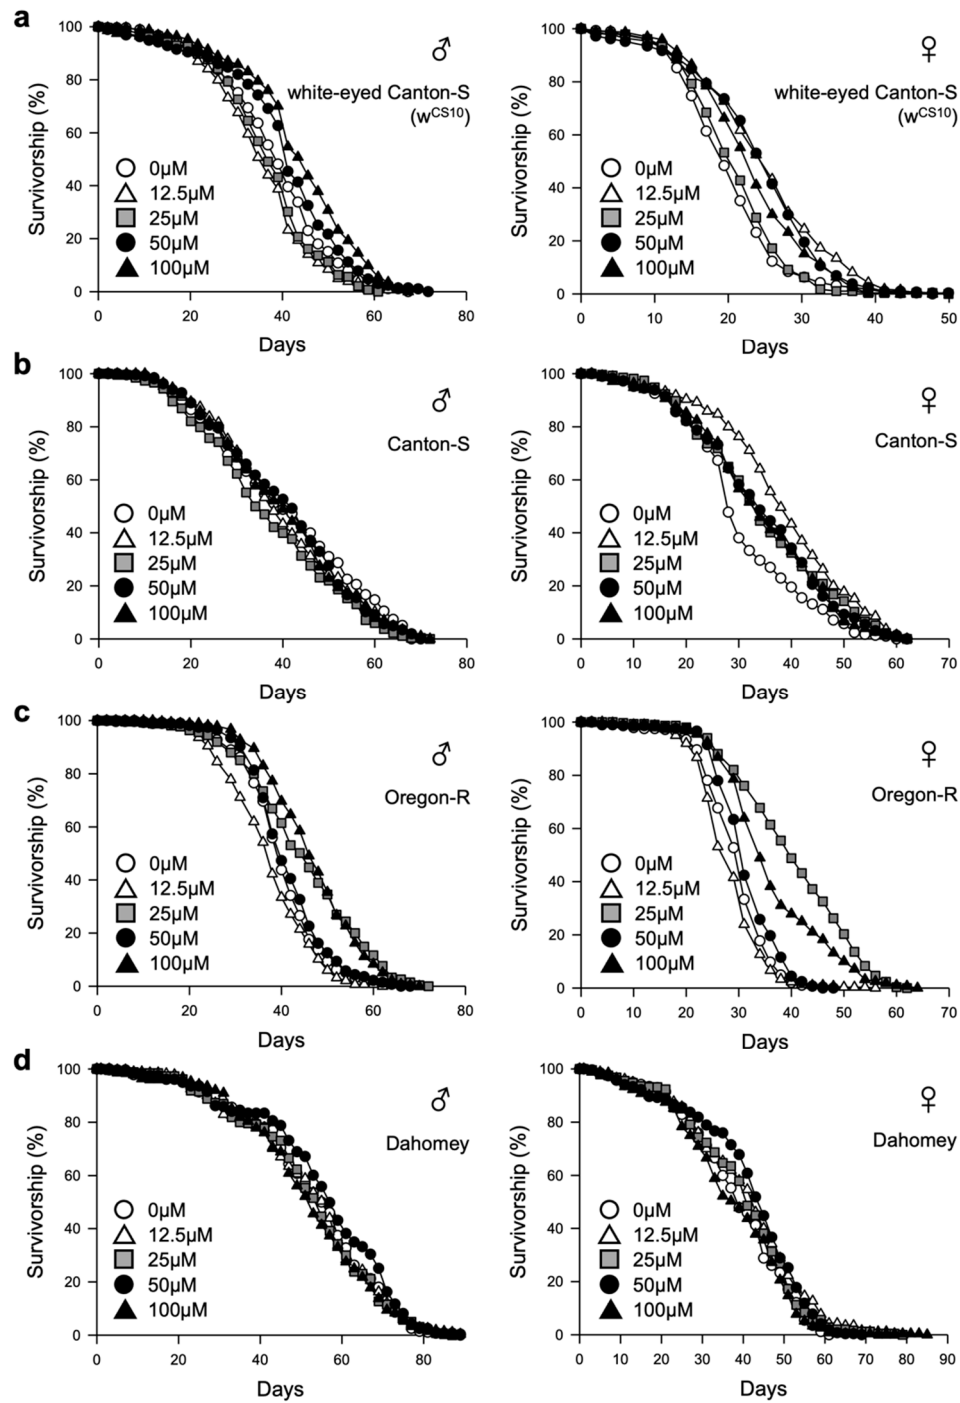

**Figure S1.** Effect of betulinic acid on lifespan in different strains. (a-d) Lifespan of white-eyed Canton-S ( $w^{CS10}$ ) (a), Canton-S (b), Oregon-R (c), and Dahomey (d). Left panels show the lifespan of male. Right panels show the lifespan of female fruit flies.

Figure S2

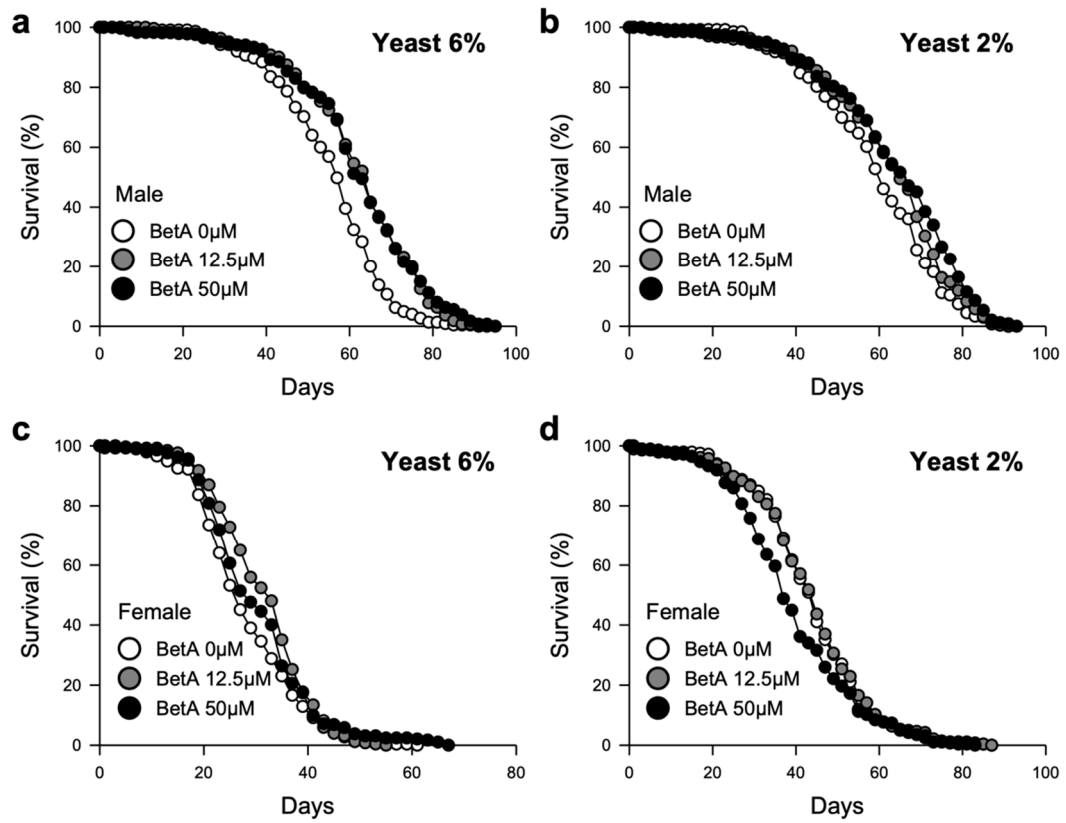

**Figure S2.** Relationship between the longevity effect of BetA and dietary restriction (DR) in fruit flies. **(a-b)** Survival curve of male flies fed BetA on 6% **(a)** or 2% Brewer's yeast diet **(b)**. **(c-d)** Survival curve of female flies fed BetA on 6% **(c)** or 2% Brewer's yeast diet **(d)**. The white circles indicate the lifespan of flies fed 0  $\mu$ M BetA, the grey circles indicate the lifespan of flies fed 12.5  $\mu$ M BetA, and the black circles indicate the lifespan of flies fed 50  $\mu$ M BetA.

Table S1 Composition of fly husbandry food

| Food                             | Composition                                             |
|----------------------------------|---------------------------------------------------------|
| Cornmeal-sugar-yeast (CSY) media | 5.2% cornmeal                                           |
|                                  | 11% sugar                                               |
|                                  | 2.6% instant yeast                                      |
|                                  | 0.5% propionic acid                                     |
|                                  | 0.04% methyl 4 hydroxybenzoate (Sigma Aldrich, MO, USA) |
| Sugar-yeast (SY) media           | 10% sugar                                               |
|                                  | 10% yeast                                               |
|                                  | 0.8% agar                                               |
|                                  | 0.5% propionic acid                                     |
|                                  | 0.04% methyl 4 hydroxybenzoate (Sigma Aldrich, MO, USA) |
| Dietary restriction experiment   | For DR condition, 2% Brewer's yeast                     |
|                                  | For FD condition, 6% Brewer's yeast                     |
|                                  | 10% sugar                                               |
|                                  | 0.8% agar                                               |
|                                  | 0.5% propionic acid                                     |
|                                  | 0.04% methyl 4 hydroxybenzoate (Sigma Aldrich, MO, USA) |

Table S2 Sequences of primers for PCR

| Primer                   | Forward (5'-3')                 | Reverse (5'-3')                 |
|--------------------------|---------------------------------|---------------------------------|
| <i>rp49</i>              | ATC GGT TAC GGA TCG AAC AA      | GAC AAT CTC CTT GCG CTT CT      |
| <i>catalase (cat)</i>    | TAC GAG CAG GCC AAG AAG TT      | ACC TTG TAC GGG CAG TTC AC      |
| <i>sod1</i>              | GTT CGG TGA CAA CAC CAA TG      | GGA GTC GGT GAT GTT GAC CT      |
| <i>sod2</i>              | TCT GAA GAA GGC CAT CGA GT      | GCA GAT AGT AGG CGT GCT CC      |
| <i>gs</i>                | TGG GAC CAG CAA GTA AAA CC      | TCG CGA ATG TAG AAC TCG TG      |
| <i>thioredoxin (trx)</i> | AAT GTG CTG GAG CTC TTC GT      | TTG TTG TCG TTG TCG CTT TC      |
| <i>dilp1</i>             | AAT GGC AAT GGT CAC GCC GAC TGG | GCT GTT GCC CAG CAA GCT TTC ACG |
| <i>dilp2</i>             | ACG AGG TGC TGA GTA TGG TGT GCG | CAC TTC GCA GCG GTT CCG ATA TCG |
| <i>dilp3</i>             | GTC CAG GCC ACC ATG AAG TTG TGC | CTT TCC AGC AGG GAA CGG TCT TCG |
| <i>dilp4</i>             | TGG ATT TAC ACG CCG TGT CAG GCG | ACA CCC TTC TCC GTA TCC GCA TGG |
| <i>dilp5</i>             | TGT TCG CCA AAC GAG GCA CCT TGG | CAC GAT TTG CGG CAA CAG GAG TCG |
| <i>dilp6</i>             | TGC TAG TCC TGG CCA CCT TGT TCG | GGA AAT ACA TCG CCA AGG GCC ACC |
| <i>dilp7</i>             | GAG CTG TAC TCC TGT TCG TCC TGC | TCC AAG CCT CAT CAT TGC CCG TCC |
| <i>sir2</i>              | CAC GAC CGT TCT ACA AGT TT      | GCA GCT CCT CCT CAG TAA C       |
| <i>thor</i>              | GAA GGT TGT CAT CTC GGA TCC     | ATG AAA GCC CGC TCG TAG         |
| <i>impl2</i>             | GCC GAT ACC TTC GTG TAT CC      | TTT CCG TCG TCA ATC CAA TAG     |
| <i>Inr</i>               | TAC TCG GAG CAT TGG AGG CAT     | AAC AGT GGC GGA TTC GGT T       |
| <i>l(2)efl</i>           | AGG GAC GAT GTG ACC GTG TC      | CGA AGC AGA CGC GTT TAT CC      |

Table S3 Effect of BetA on lifespan in fruit flies

| Sex    | Betulinic Acid ( $\mu\text{M}$ ) | n   | Mean-lifespan    | Change (vs. 0 $\mu\text{M}$ ) | Median-lifespan | Maximum-lifespan | $\chi^2$ (vs. 0 $\mu\text{M}$ ) | p-value (vs. 0 $\mu\text{M}$ ) | Mortality            | R <sup>2</sup> |
|--------|----------------------------------|-----|------------------|-------------------------------|-----------------|------------------|---------------------------------|--------------------------------|----------------------|----------------|
| Male   | 0                                | 299 | 44.84 $\pm$ 0.63 |                               | 45              | 51               |                                 |                                | y = 0.1811x - 6.7948 | 0.8908         |
|        | 10                               | 301 | 49.96 $\pm$ 0.65 | 11%                           | 51              | 57               | 34.1957                         | < 0.0001*                      | y = 0.1944x - 7.4026 | 0.9153         |
|        | 25                               | 310 | 47.84 $\pm$ 0.71 | 7%                            | 49              | 57               | 15.691                          | < 0.0001*                      | y = 0.2045x - 7.352  | 0.9051         |
|        | 50                               | 296 | 50.82 $\pm$ 0.68 | 13%                           | 53              | 59               | 51.0212                         | < 0.0001*                      | y = 0.1156x - 5.7423 | 0.5614         |
|        | 100                              | 300 | 47.73 $\pm$ 0.70 | 6%                            | 51              | 55               | 15.3152                         | < 0.0001*                      | y = 0.182x - 6.8224  | 0.8616         |
| Female | 0                                | 285 | 42.31 $\pm$ 0.68 |                               | 43              | 49               |                                 |                                | y = 0.2142x - 6.8755 | 0.8957         |
|        | 10                               | 278 | 44.14 $\pm$ 0.75 | 4%                            | 47              | 55               | 6.6335                          | 0.0100*                        | y = 0.1905x - 6.4423 | 0.9016         |
|        | 25                               | 279 | 44.11 $\pm$ 0.77 | 4%                            | 45              | 53               | 7.704                           | 0.0055*                        | y = 0.1959x - 6.4437 | 0.9242         |
|        | 50                               | 269 | 44.73 $\pm$ 0.79 | 6%                            | 47              | 55               | 12.0737                         | 0.0005*                        | y = 0.1741x - 6.4269 | 0.9452         |
|        | 100                              | 287 | 42.58 $\pm$ 0.72 | 1%                            | 43              | 51               | 0.6566                          | 0.4177                         | y = 0.2028x - 6.4784 | 0.9404         |

Table S4 Effect of BetA on lifespan in fruit flies on DR condition

| Sex    | Group    |              | n   | Mean-lifespan    | Change<br>(vs. 0 $\mu$ M) | Median-lifespan | Maximum-<br>lifespan | $\chi^2$<br>(vs. 0 $\mu$ M) | p-value<br>(vs. 0 $\mu$ M) |
|--------|----------|--------------|-----|------------------|---------------------------|-----------------|----------------------|-----------------------------|----------------------------|
| Male   | Yeast 2% | 0 $\mu$ M    | 269 | 59.57 $\pm$ 0.94 |                           | 61              | 71                   |                             |                            |
|        |          | 12.5 $\mu$ M | 277 | 62.48 $\pm$ 0.98 | 5%                        | 65              | 73                   | 6.1229                      | 0.0133*                    |
|        |          | 50 $\mu$ M   | 244 | 63.94 $\pm$ 1.09 | 7%                        | 67              | 77                   | 16.2592                     | < 0.0001*                  |
|        | Yeast 6% | 0 $\mu$ M    | 225 | 55.41 $\pm$ 0.89 |                           | 57              | 65                   |                             |                            |
|        |          | 12.5 $\mu$ M | 271 | 62.14 $\pm$ 0.91 | 12%                       | 65              | 73                   | 41.9287                     | < 0.0001*                  |
|        |          | 50 $\mu$ M   | 287 | 62.14 $\pm$ 0.95 | 12%                       | 63              | 73                   | 43.946                      | < 0.0001*                  |
| Female | Yeast 2% | 0 $\mu$ M    | 285 | 47.72 $\pm$ 0.80 |                           | 49              | 57                   |                             |                            |
|        |          | 12.5 $\mu$ M | 284 | 47.96 $\pm$ 0.84 | 1%                        | 49              | 57                   | 0.2482                      | 0.6183                     |
|        |          | 50 $\mu$ M   | 285 | 43.65 $\pm$ 0.85 | -9%                       | 41              | 53                   | 7.5816                      | 0.0059*                    |
|        | Yeast 6% | 0 $\mu$ M    | 295 | 34.55 $\pm$ 0.57 |                           | 33              | 41                   |                             |                            |
|        |          | 12.5 $\mu$ M | 254 | 37.96 $\pm$ 0.55 | 10%                       | 39              | 45                   | 9.26                        | 0.0023*                    |
|        |          | 50 $\mu$ M   | 292 | 36.71 $\pm$ 0.61 | 6%                        | 35              | 43                   | 6.0009                      | 0.0143*                    |

Table S5 Effect of BetA on lifespan in mutant fruit flies

| Sex    | Strain                         | Group      | n   | Mean-lifespan    | Change<br>(vs. 0 $\mu$ M) | Median-<br>lifespan | Maximum-<br>lifespan | $\chi^2$<br>(vs. 0 $\mu$ M) | p-value<br>(vs. 0 $\mu$ M) |
|--------|--------------------------------|------------|-----|------------------|---------------------------|---------------------|----------------------|-----------------------------|----------------------------|
| Male   | <i>w<sup>1118</sup></i>        | 0 $\mu$ M  | 266 | 68.37 $\pm$ 0.78 |                           | 69                  | 77                   |                             |                            |
|        |                                | 50 $\mu$ M | 290 | 72.28 $\pm$ 0.79 | 6%                        | 75                  | 79                   | 16.9553                     | < 0.0001*                  |
|        | <i>sir2<sup>4.5/5.26</sup></i> | 0 $\mu$ M  | 259 | 66.81 $\pm$ 0.81 |                           | 69                  | 75                   |                             |                            |
|        |                                | 50 $\mu$ M | 282 | 67.29 $\pm$ 0.61 | 1%                        | 69                  | 75                   | 1.2807                      | 0.2578                     |
|        | <i>yw</i>                      | 0 $\mu$ M  | 299 | 30.83 $\pm$ 0.82 |                           | 30                  | 40                   |                             |                            |
|        |                                | 50 $\mu$ M | 265 | 39.54 $\pm$ 0.92 | 28%                       | 42                  | 50                   | 47.8442                     | < 0.0001*                  |
|        | <i>foxo<sup>25/21</sup></i>    | 0 $\mu$ M  | 323 | 52.24 $\pm$ 0.97 |                           | 56                  | 68                   |                             |                            |
|        |                                | 50 $\mu$ M | 286 | 54.95 $\pm$ 0.96 | 5%                        | 60                  | 68                   | 0.5619                      | 0.4535                     |
| Female | <i>w<sup>1118</sup></i>        | 0 $\mu$ M  | 297 | 56.26 $\pm$ 0.91 |                           | 53                  | 69                   |                             |                            |
|        |                                | 50 $\mu$ M | 310 | 64.32 $\pm$ 0.94 | 14%                       | 67                  | 77                   | 31.3537                     | < 0.0001*                  |
|        | <i>sir2<sup>4.5/5.26</sup></i> | 0 $\mu$ M  | 279 | 55.92 $\pm$ 0.78 |                           | 59                  | 63                   |                             |                            |
|        |                                | 50 $\mu$ M | 272 | 57.51 $\pm$ 0.68 | 3%                        | 59                  | 65                   | 0.1711                      | 0.6791                     |
|        | <i>yw</i>                      | 0 $\mu$ M  | 295 | 50.47 $\pm$ 0.90 |                           | 55                  | 63                   |                             |                            |
|        |                                | 50 $\mu$ M | 271 | 54.17 $\pm$ 0.90 | 7%                        | 59                  | 65                   | 12.4621                     | 0.0004*                    |
|        | <i>foxo<sup>25/21</sup></i>    | 0 $\mu$ M  | 277 | 58.39 $\pm$ 0.88 |                           | 61                  | 69                   |                             |                            |
|        |                                | 50 $\mu$ M | 250 | 55.65 $\pm$ 1.14 | -5%                       | 61                  | 67                   | 0.0037                      | 0.9513                     |
